# Supplementary material for: Living With Inflammatory Bowel Disease: Protocol for a Longitudinal Study of Factors Associated With Symptom Exacerbations
Source: PubMed Central journal article supplement (PMC6256106; doi:10.2196/11317), 2018-11-12
Supplement: resprot_v7i11e11317_app1.pdf [file resprot_v7i11e11317_app1.pdf]

|                                                    | 0 | 2 | 4 | 6 | 8 | 10 | 12 | 14 | 16 | 18 | 20 | 22 | 24 | 26 | 28 | 30 | 32 | 34 | 36 | 38 | 40 | 42 | 44 | 46 | 48 | 50 | 52 |
|----------------------------------------------------|---|---|---|---|---|----|----|----|----|----|----|----|----|----|----|----|----|----|----|----|----|----|----|----|----|----|----|
| <b>IBD Symptom Inventory Long Form (IBDSI-LF)</b>  | ✓ |   |   |   |   |    |    |    |    |    |    |    |    | ✓  |    |    |    |    |    |    |    |    |    |    |    |    | ✓  |
| <b>IBD Symptom Inventory Short Form (IBDSI-SF)</b> |   | ✓ | ✓ | ✓ | ✓ | ✓  | ✓  | ✓  | ✓  | ✓  | ✓  | ✓  | ✓  |    | ✓  | ✓  | ✓  | ✓  | ✓  | ✓  | ✓  | ✓  | ✓  | ✓  | ✓  | ✓  | ✓  |
| <b>Manitoba IBD Index (MIBDI)</b>                  | ✓ |   |   |   |   |    |    |    |    |    |    |    |    | ✓  |    |    |    |    |    |    |    |    |    |    |    |    | ✓  |
| <b>IBD Symptom Change Indicator (SCI)</b>          |   | ✓ | ✓ | ✓ | ✓ | ✓  | ✓  | ✓  | ✓  | ✓  | ✓  | ✓  | ✓  | ✓  | ✓  | ✓  | ✓  | ✓  | ✓  | ✓  | ✓  | ✓  | ✓  | ✓  | ✓  | ✓  | ✓  |
| <b>Flare Certainty Indicator</b>                   |   | ✓ | ✓ | ✓ | ✓ | ✓  | ✓  | ✓  | ✓  | ✓  | ✓  | ✓  | ✓  | ✓  | ✓  | ✓  | ✓  | ✓  | ✓  | ✓  | ✓  | ✓  | ✓  | ✓  | ✓  | ✓  | ✓  |
| <b>Active vs Inactive Disease</b>                  |   | ✓ | ✓ | ✓ | ✓ | ✓  | ✓  | ✓  | ✓  | ✓  | ✓  | ✓  | ✓  | ✓  | ✓  | ✓  | ✓  | ✓  | ✓  | ✓  | ✓  | ✓  | ✓  | ✓  | ✓  | ✓  | ✓  |
| <b>Short IBD Questionnaire (SIBDQ)</b>             | ✓ | ✓ | ✓ | ✓ | ✓ | ✓  | ✓  | ✓  | ✓  | ✓  | ✓  | ✓  | ✓  | ✓  | ✓  | ✓  | ✓  | ✓  | ✓  | ✓  | ✓  | ✓  | ✓  | ✓  | ✓  | ✓  | ✓  |
| <b>Disability</b>                                  |   | ✓ | ✓ | ✓ | ✓ | ✓  | ✓  | ✓  | ✓  | ✓  | ✓  | ✓  | ✓  | ✓  | ✓  | ✓  | ✓  | ✓  | ✓  | ✓  | ✓  | ✓  | ✓  | ✓  | ✓  | ✓  | ✓  |
| <b>Health Care Utilization</b>                     |   | ✓ | ✓ | ✓ | ✓ | ✓  | ✓  | ✓  | ✓  | ✓  | ✓  | ✓  | ✓  | ✓  | ✓  | ✓  | ✓  | ✓  | ✓  | ✓  | ✓  | ✓  | ✓  | ✓  | ✓  | ✓  | ✓  |
| <b>IBD Investigations</b>                          | ✓ |   |   |   |   |    |    | ✓  |    |    |    |    |    | ✓  |    |    |    |    |    |    | ✓  |    |    |    |    |    | ✓  |

|                                       | 0 | 2 | 4 | 6 | 8 | 10 | 12 | 14 | 16 | 18 | 20 | 22 | 24 | 26 | 28 | 30 | 32 | 34 | 36 | 38 | 40 | 42 | 44 | 46 | 48 | 50 | 52 |   |   |
|---------------------------------------|---|---|---|---|---|----|----|----|----|----|----|----|----|----|----|----|----|----|----|----|----|----|----|----|----|----|----|---|---|
| <b>IBD Medications</b>                | ✓ | ✓ | ✓ | ✓ | ✓ | ✓  | ✓  | ✓  | ✓  | ✓  | ✓  | ✓  | ✓  | ✓  | ✓  | ✓  | ✓  | ✓  | ✓  | ✓  | ✓  | ✓  | ✓  | ✓  | ✓  | ✓  | ✓  | ✓ |   |
| <b>Non-IBD Medications: full list</b> | ✓ |   |   |   |   |    |    | ✓  |    |    |    |    |    | ✓  |    |    |    |    |    |    | ✓  |    |    |    |    |    |    | ✓ |   |
| <b>Non-IBD Medications: changes</b>   |   | ✓ | ✓ | ✓ | ✓ | ✓  | ✓  | ✓  | ✓  | ✓  | ✓  | ✓  | ✓  | ✓  | ✓  | ✓  | ✓  | ✓  | ✓  | ✓  | ✓  | ✓  | ✓  | ✓  | ✓  | ✓  | ✓  | ✓ | ✓ |
| <b>Pain Medications</b>               |   | ✓ | ✓ | ✓ | ✓ | ✓  | ✓  | ✓  | ✓  | ✓  | ✓  | ✓  | ✓  | ✓  | ✓  | ✓  | ✓  | ✓  | ✓  | ✓  | ✓  | ✓  | ✓  | ✓  | ✓  | ✓  | ✓  | ✓ | ✓ |
| <b>Medication Adherence (MARS-5)</b>  | ✓ |   |   |   |   |    |    |    |    |    |    |    |    |    |    |    |    |    |    |    |    |    |    |    |    |    |    | ✓ |   |

Witges K, Targownik LE, Haviva C, Walker JR, Graff LA, Sexton KA, Lix L, Sargent M, Vagianos K, Bernstein CN  
 Living With Inflammatory Bowel Disease: Protocol for a Longitudinal Study of Factors Associated With Symptom Exacerbations  
 JMIR Res Protoc 2018;7(10):e11317  
<http://www.researchprotocols.org/2018/10/e11317/>
